# Supplementary material for: Automatic Methane Plume Masking Based on Wavelet Transform Image Processing: Application to MethaneAIR and MethaneSAT data
Source: Copernicus journal article supplement (doi:10.5194/egusphere-2026-141), 2026-01-30
Supplement: Supplementary file 1 [file Wavelet_paper_AMT_SI.pdf › Wavelet_paper_AMT_SI.pdf]

# Supplementary Information for:

Automatic Methane Plume Masking Based on Wavelet  
Transform Image Processing: Application to MethaneAIR and  
MethaneSAT data

## Contents

1. Supplemental Methods
2. Supplemental Figures
3. Supplemental Tables

## 1 Supplemental Methods

### 1.1 Sensitivity analysis

For the parameters that need to be empirically determined, we provide a detailed sensitivity analysis to show how different values affect detection results. For MethaneAIR, these parameters include: the scaling factor to determine the pre-processing pixel value threshold (Table S1), the scaling factor to determine the plume masking pixel value threshold (Table S2), the plume mask size threshold (Table S3), the plume hotspot size threshold (Table S4), the angle buffer in wind direction filtering (Table S5), and the fiber length ratio in shape filtering (Table S6). For MethaneSAT, we include the same six parameters above, plus the local background width to determine the pre-processing pixel value threshold (Table S8), and the local background width to determine the plume masking pixel value threshold (Table S10).

Here the scaling factors are used for determining thresholds for denoising or masking, where the threshold used is the mean  $XCH_4$  value of the scene plus the scaling factor times the standard deviation of  $XCH_4$  for the scene.

For each parameter, we independently choose three example scenes that have numerous plumes and represent varying surface features and local wind characteristics for MethaneAIR and MethaneSAT, respectively: Scene 1 represents the Permian basin (high albedo) with high wind speed, Scene 2 repre-

sents the Appalachian basin (low albedo), and Scene 3 represents the Permian basin with low wind speed.

## 2 Supplemental Figures

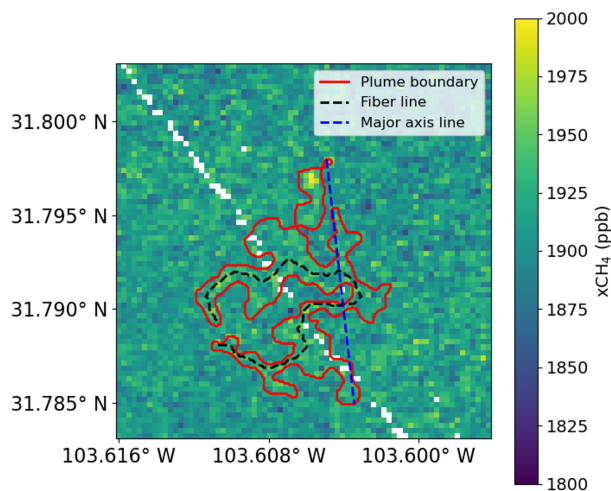

Figure S1: A MethaneAIR false plume example with the “spider” shape plume mask. Such a mask has its fiber line (black) much longer than its major axis line (blue)

## 3 Supplemental Tables

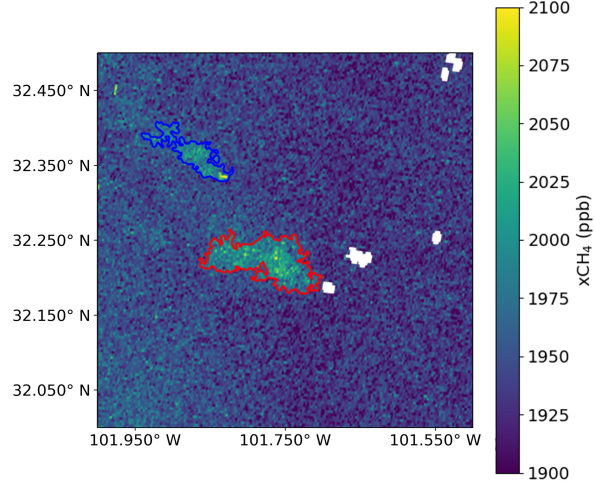

Figure S2: A MethaneSAT false plume example with no clear hotspots (red). This could be a diffuse enhancement from a source that stopped emitting, thus the plume was observed downwind of the source. In comparison, clear hotspot can be easily found in a true plume (blue).

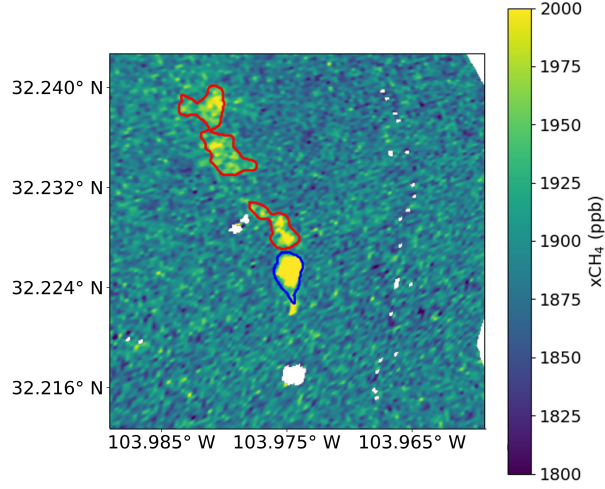

Figure S3: A MethaneAIR example of a plume dissected into multiple detached clumps by eddies. In this case, the plume mask closest to the source (blue) is considered true and the others downwind (red) are considered false.

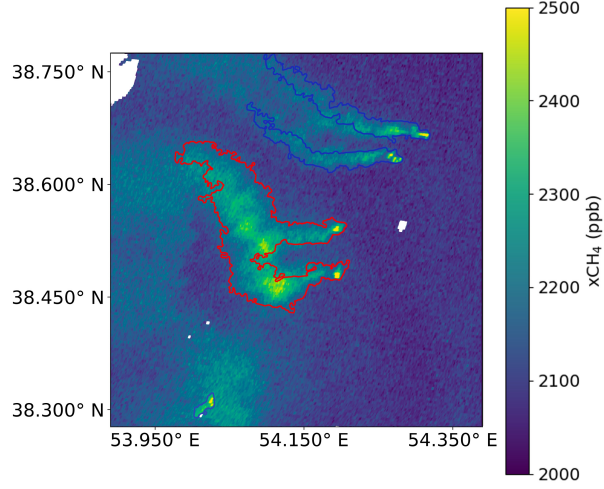

Figure S4: A MethaneSAT subspace with two plumes merging in the downwind direction. In this case, the plume mask that covers the two merged plumes (red) is considered false, and the others (blue) are considered true.

| Pre-processing scaling factor - MethaneAIR |         |         |         |         |         |         |
|--------------------------------------------|---------|---------|---------|---------|---------|---------|
|                                            | Scene 1 |         | Scene 2 |         | Scene 3 |         |
| Values                                     | # True  | # False | # True  | # False | # True  | # False |
| 1.0                                        | 54      | 47      | 41      | 20      | 15      | 5       |
| 1.5                                        | 53      | 33      | 40      | 6       | 13      | 1       |
| <b>2.0</b>                                 | 56      | 21      | 37      | 4       | 13      | 1       |
| 2.5                                        | 49      | 18      | 37      | 3       | 7       | 1       |

Table S1: Sensitivity analysis for the pre-processing scaling factor in three MethaneAIR flights with varying surface features and wind speeds. 2.0 is the final choice.

|            | Plume masking scaling factor - MethaneAIR |         |         |         |         |         |
|------------|-------------------------------------------|---------|---------|---------|---------|---------|
|            | Scene 1                                   |         | Scene 2 |         | Scene 3 |         |
| Values     | # True                                    | # False | # True  | # False | # True  | # False |
| 1.0        | 53                                        | 50      | 40      | 10      | 11      | 10      |
| <b>1.5</b> | 56                                        | 21      | 37      | 4       | 13      | 1       |
| 2.0        | 50                                        | 19      | 36      | 2       | 12      | 0       |
| 2.5        | 43                                        | 9       | 33      | 2       | 12      | 0       |

Table S2: Sensitivity analysis for the plume masking scaling factor in three MethaneAIR flights with varying surface features and wind speeds. 1.5 is the final choice.

|            | Plume mask size - MethaneAIR |         |         |         |         |         |
|------------|------------------------------|---------|---------|---------|---------|---------|
|            | Scene 1                      |         | Scene 2 |         | Scene 3 |         |
| Values     | # True                       | # False | # True  | # False | # True  | # False |
| 50         | 58                           | 32      | 41      | 17      | 15      | 10      |
| <b>100</b> | 56                           | 21      | 37      | 4       | 13      | 1       |
| 150        | 54                           | 20      | 37      | 4       | 13      | 1       |
| 200        | 54                           | 17      | 37      | 4       | 13      | 1       |

Table S3: Sensitivity analysis for the plume mask size in three MethaneAIR flights with varying surface features and wind speeds. 100 is the final choice.

|           | Plume hotspot size - MethaneAIR |         |         |         |         |         |
|-----------|---------------------------------|---------|---------|---------|---------|---------|
|           | Scene 1                         |         | Scene 2 |         | Scene 3 |         |
| Values    | # True                          | # False | # True  | # False | # True  | # False |
| 50        | 56                              | 35      | 37      | 20      | 13      | 8       |
| <b>10</b> | 56                              | 21      | 37      | 4       | 13      | 1       |
| 15        | 51                              | 18      | 37      | 4       | 13      | 1       |
| 20        | 49                              | 13      | 34      | 4       | 13      | 1       |

Table S4: Sensitivity analysis for the plume hotspot size in three MethaneAIR flights with varying surface features and wind speeds. 10 is the final choice.

|            | Wind direction filter angle buffer - MethaneAIR |         |         |         |         |         |
|------------|-------------------------------------------------|---------|---------|---------|---------|---------|
|            | Scene 1                                         |         | Scene 2 |         | Scene 3 |         |
| Values (°) | # True                                          | # False | # True  | # False | # True  | # False |
| 45         | 51                                              | 18      | 36      | 4       | 13      | 0       |
| 50         | 55                                              | 21      | 37      | 4       | 13      | 0       |
| <b>55</b>  | 56                                              | 21      | 37      | 4       | 13      | 1       |
| 60         | 56                                              | 29      | 39      | 9       | 13      | 2       |

Table S5: Sensitivity analysis for the wind direction filter angle buffer in three MethaneAIR flights with varying surface features and wind speeds. 55° is the final choice.

|             | Fiber length ratio - MethaneAIR |         |         |         |         |         |
|-------------|---------------------------------|---------|---------|---------|---------|---------|
|             | Scene 1                         |         | Scene 2 |         | Scene 3 |         |
| Values      | # True                          | # False | # True  | # False | # True  | # False |
| 1.00        | 41                              | 17      | 26      | 4       | 11      | 1       |
| <b>1.25</b> | 56                              | 21      | 37      | 4       | 13      | 1       |
| 1.50        | 56                              | 26      | 37      | 8       | 13      | 4       |
| 1.75        | 46                              | 28      | 37      | 11      | 13      | 4       |

Table S6: Sensitivity analysis for the fiber length ratio in three MethaneAIR flights with varying surface features and wind speeds. 1.25 is the final choice.

|             | Pre-processing scaling factor - MethaneSAT |         |         |         |         |         |
|-------------|--------------------------------------------|---------|---------|---------|---------|---------|
|             | Scene 1                                    |         | Scene 2 |         | Scene 3 |         |
| Values      | # True                                     | # False | # True  | # False | # True  | # False |
| 1.25        | 8                                          | 7       | 12      | 16      | 1       | 4       |
| 1.50        | 8                                          | 3       | 12      | 10      | 1       | 2       |
| <b>1.75</b> | 7                                          | 2       | 12      | 8       | 1       | 0       |
| 2.00        | 2                                          | 0       | 7       | 3       | 1       | 0       |

Table S7: Sensitivity analysis for the pre-processing scaling factor in three MethaneSAT flights with varying surface features and wind speeds. 1.75 is the final choice.

|             | Pre-processing local background width - MethaneSAT |         |         |         |         |         |
|-------------|----------------------------------------------------|---------|---------|---------|---------|---------|
|             | Scene 1                                            |         | Scene 2 |         | Scene 3 |         |
| Values (m)  | # True                                             | # False | # True  | # False | # True  | # False |
| 2250        | 4                                                  | 2       | 12      | 8       | 1       | 0       |
| <b>4500</b> | 7                                                  | 2       | 12      | 8       | 1       | 0       |
| 6750        | 7                                                  | 3       | 10      | 12      | 1       | 0       |
| 9000        | 5                                                  | 1       | 11      | 7       | 1       | 0       |

Table S8: Sensitivity analysis for the pre-processing local background width in three MethaneSAT flights with varying surface features and wind speeds. 4500m is the final choice.

|             | Plume masking scaling factor - MethaneSAT |         |         |         |         |         |
|-------------|-------------------------------------------|---------|---------|---------|---------|---------|
|             | Scene 1                                   |         | Scene 2 |         | Scene 3 |         |
| Values      | # True                                    | # False | # True  | # False | # True  | # False |
| 1.25        | 8                                         | 6       | 12      | 12      | 1       | 5       |
| 1.50        | 7                                         | 3       | 12      | 11      | 1       | 0       |
| <b>1.75</b> | 7                                         | 2       | 12      | 8       | 1       | 0       |
| 2.00        | 4                                         | 0       | 7       | 3       | 1       | 0       |

Table S9: Sensitivity analysis for the plume masking scaling factor in three MethaneSAT flights with varying surface features and wind speeds. 1.75 is the final choice.

|             | Plume masking local background width - MethaneSAT |         |         |         |         |         |
|-------------|---------------------------------------------------|---------|---------|---------|---------|---------|
|             | Scene 1                                           |         | Scene 2 |         | Scene 3 |         |
| Values (m)  | # True                                            | # False | # True  | # False | # True  | # False |
| 2250        | 6                                                 | 2       | 12      | 8       | 1       | 0       |
| <b>4500</b> | 7                                                 | 2       | 12      | 8       | 1       | 0       |
| 6750        | 7                                                 | 2       | 12      | 8       | 1       | 0       |
| 9000        | 5                                                 | 0       | 10      | 5       | 1       | 0       |

Table S10: Sensitivity analysis for the plume masking local background width in three MethaneSAT flights with varying surface features and wind speeds. 4500m is the final choice.

|            | Plume mask size - MethaneSAT |         |         |         |         |         |
|------------|------------------------------|---------|---------|---------|---------|---------|
|            | Scene 1                      |         | Scene 2 |         | Scene 3 |         |
| Values     | # True                       | # False | # True  | # False | # True  | # False |
| 250        | 8                            | 15      | 12      | 14      | 1       | 3       |
| <b>500</b> | 7                            | 2       | 12      | 8       | 1       | 0       |
| 750        | 5                            | 2       | 11      | 6       | 1       | 0       |
| 1000       | 3                            | 2       | 11      | 4       | 1       | 0       |

Table S11: Sensitivity analysis for the plume mask size in three MethaneSAT flights with varying surface features and wind speeds. 500 is the final choice.

|           | Plume hotspot size - MethaneSAT |         |         |         |         |         |
|-----------|---------------------------------|---------|---------|---------|---------|---------|
|           | Scene 1                         |         | Scene 2 |         | Scene 3 |         |
| Values    | # True                          | # False | # True  | # False | # True  | # False |
| 10        | 7                               | 2       | 12      | 11      | 1       | 0       |
| <b>20</b> | 7                               | 2       | 12      | 8       | 1       | 0       |
| 30        | 7                               | 2       | 11      | 8       | 1       | 0       |
| 40        | 7                               | 2       | 11      | 6       | 1       | 0       |

Table S12: Sensitivity analysis for the plume hotspot size in three MethaneSAT flights with varying surface features and wind speeds. 20 is the final choice.

|            | Wind direction filter angle buffer - MethaneSAT |         |         |         |         |         |
|------------|-------------------------------------------------|---------|---------|---------|---------|---------|
|            | Scene 1                                         |         | Scene 2 |         | Scene 3 |         |
| Values (°) | # True                                          | # False | # True  | # False | # True  | # False |
| 45         | 7                                               | 2       | 12      | 8       | 1       | 0       |
| 50         | 7                                               | 2       | 12      | 8       | 1       | 0       |
| <b>55</b>  | 7                                               | 2       | 12      | 8       | 1       | 0       |
| 60         | 7                                               | 2       | 12      | 9       | 1       | 0       |

Table S13: Sensitivity analysis for the wind direction filter angle buffer in three MethaneSAT flights with varying surface features and wind speeds. 55° is the final choice.



|             | Fiber length ratio - MethaneSAT |         |         |         |         |         |
|-------------|---------------------------------|---------|---------|---------|---------|---------|
|             | Scene 1                         |         | Scene 2 |         | Scene 3 |         |
| Values      | # True                          | # False | # True  | # False | # True  | # False |
| 1.00        | 4                               | 2       | 3       | 4       | 0       | 0       |
| <b>1.25</b> | 7                               | 2       | 12      | 8       | 1       | 0       |
| 1.50        | 7                               | 4       | 12      | 8       | 1       | 0       |
| 1.75        | 7                               | 4       | 12      | 10      | 1       | 0       |

Table S14: Sensitivity analysis for the fiber length ratio in three MethaneSAT flights with varying surface features and wind speeds. 1.25 is the final choice.
